# Supplementary material
Source: PubMed Central journal article supplement (PMC3672077)
Supplement: supp_djt093_jnci_JNCI_12_0971_s02.pdf [file supp_djt093_jnci_JNCI_12_0971_s02.pdf]

**Supplementary Table 1. Quantification of VEGF in ascites, pleural effusions, plasma, and serum of cancer patients**

| Ref                                    | Year | Cancer <sup>1</sup> | VEGF isoform <sup>2</sup> | Method <sup>3</sup> | Statistics <sup>4</sup> | n   | Diagnosis <sup>5</sup> | VEGF source <sup>6</sup> | [VEGF] (mean/median) | Std. Dev. | unit          | [VEGF] (pM) | [VEGF] (pg/ml) |
|----------------------------------------|------|---------------------|---------------------------|---------------------|-------------------------|-----|------------------------|--------------------------|----------------------|-----------|---------------|-------------|----------------|
| <i>Specific cancers</i>                |      |                     |                           |                     |                         |     |                        |                          |                      |           |               |             |                |
| <u>Kraft et al., 1999</u> <sup>†</sup> | 1999 | BC                  | NS                        | ELISA               | MCI; R                  | 12  | all pat.               | PE                       | 885                  |           | pg/ml         | 20          | 885            |
|                                        |      |                     |                           |                     |                         | 129 | Met, Nmet              | Serum                    | 362                  |           | pg/ml         | 8           | 362            |
| Zebrowski et al., 1999                 | 1999 | BC                  | NS                        | ELISA               | MR                      | 7   | all pat.               | PE                       | 47                   |           | pg/mg protein | 31          | 1410           |
| Sun et al., 2003                       | 2003 | CRC                 | NS                        | ELISA               | MSE                     | 5   | all pat.               | Ascites                  | 403                  | 140       | pg/ml         | 9           | 403            |
| Sun et al., 2003                       | 2003 | GC                  | NS                        | ELISA               | MSE                     | 6   | all pat.               | Ascites                  | 541                  | 123       | pg/ml         | 12          | 541            |
| <u>Kraft et al., 1999</u>              | 1999 | GIC                 | NS                        | ELISA               | MCI; R                  | 9   | all pat.               | PE                       | 813                  |           | pg/ml         | 18          | 813            |
|                                        |      |                     |                           |                     |                         | 48  | Met, Nmet              | Serum                    | 433                  |           | pg/ml         | 10          | 433            |
| Jin et al., 2004                       | 2004 | LC                  | NS                        | ELISA               | MSE                     | 40  | all pat.               | PE                       | 2596                 | 719       | pg/ml         | 58          | 2596           |
| <u>Kishiro et al., 2002</u>            | 2002 | LC                  | 121, 165, 189             | ELISA               | MSE                     | 5   | all pat.               | PE                       | 17526                | 22498     | pg/ml         | 389         | 17526          |
|                                        |      |                     |                           |                     |                         | 28  | S. (IIIA-IV)           | Plasma                   | 161                  | 177       | pg/ml         | 4           | 161            |
| <u>Matsuyama et al., 2000</u>          | 2000 | LC                  | 121, 165                  | ELISA               | MSE                     | 6   | S. (I-IV)              | PE                       | 532                  | 285       | pg/ml         | 12          | 532            |
|                                        |      |                     |                           |                     |                         | 49  | S. (I-IV)              | Serum                    | 406                  |           | pg/ml         | 9           | 406            |
| <u>Sack et al., 2005</u>               | 2005 | LC                  | NS                        | ELISA               | MSE                     | 58  | all pat.               | PE                       | 2349 <sup>e</sup>    | 2910      | pg/ml         | 52          | 2349           |
|                                        |      |                     |                           |                     |                         | 58  | all pat.               | Serum                    | 500                  | 140       | pg/ml         | 11          | 500            |
| Thickett et al., 1999                  | 1999 | LC                  | NS                        | ELISA               | MR                      | 36  | all pat.               | PE                       | 2500                 |           | pg/ml         | 56          | 2500           |
| Yanagawa et al., 1999                  | 1999 | LC                  | NS                        | EIA                 | MSE                     | 60  | all pat.               | PE                       | 2920                 | 820       | pg/ml         | 65          | 2920           |
| Zebrowski et al., 1999                 | 1999 | LC                  | NS                        | ELISA               | MR                      | 15  |                        | PE                       | 75                   |           | pg/mg protein | 50          | 2250           |
| Zhou et al., 2009                      | 2009 | LC                  | NS                        | ELISA               | MSE                     | 62  | all pat.               | PE                       | 3710                 | 1650      | pg/ml         | 82          | 3710           |
| Zebrowski et al., 1999                 | 1999 | Lym                 | NS                        | ELISA               | MR                      | 6   | all pat.               | PE                       | 31                   |           | pg/mg protein | 21          | 930            |
| Zebrowski et al., 1999                 | 1999 | Mes                 | NS                        | ELISA               | MR                      | 4   | all pat.               | PE                       | 145                  |           | pg/mg protein | 97          | 4350           |
| <u>Harlozinska et al., 2004</u>        | 2004 | OC                  | 165                       | ELISA               | MR                      | 52  | S. (I-IV)              | Ascites                  | 3035                 |           | pg/ml         | 67          | 3035           |
|                                        |      |                     |                           |                     |                         | 86  | S. (I-IV)              | Serum                    | 389                  |           | pg/ml         | 9           | 389            |
| <u>Kraft et al., 1999</u>              | 1999 | OC                  | NS                        | ELISA               | MCI; R                  | 28  | all pat.               | PE                       | 5528                 |           | pg/ml         | 123         | 5528           |
|                                        |      |                     |                           |                     |                         | 35  | Met, Nmet              | Serum                    | 1022                 |           | pg/ml         | 23          | 1022           |
| Nascimento et al., 2004                | 2004 | OC                  | NS                        | ELISA               | Md                      | 13  | all pat.               | Ascites                  | 1266                 |           | pg/ml         | 28          | 1266           |
| <u>Rudlowski et al., 2006</u>          | 2006 | OC                  | NS                        | ELISA               | MR                      | 65  | S. (I-IV)              | Ascites                  | 2575                 |           | pg/ml         | 57          | 2575           |
|                                        |      |                     |                           |                     |                         | 65  | S. (I-IV)              | Serum                    | 174                  |           | pg/ml         | 4           | 174            |

| Ref                            | Year | Cancer <sup>1</sup>                                | VEGF isoform <sup>2</sup> | Method <sup>3</sup> | Statistics <sup>4</sup> | n   | Diagnosis <sup>5</sup> | VEGF source <sup>6</sup> | [VEGF] (mean/median) | Std. Dev. | unit          | [VEGF] (pM) | [VEGF] (pg/ml) |
|--------------------------------|------|----------------------------------------------------|---------------------------|---------------------|-------------------------|-----|------------------------|--------------------------|----------------------|-----------|---------------|-------------|----------------|
| Sun et al., 2003               | 2003 | OC                                                 | NS                        | ELISA               | MSE                     | 8   | all pat.               | Ascites                  | 866                  | 208       | pg/ml         | 19          | 866            |
| Yabushita et al., 2003         | 2003 | OC                                                 | NS                        | EIA                 | MSE                     | 24  | S. (I-IV)              | Ascites                  | 1465                 | 238       | pg/ml         | 33          | 1465           |
| <u>Yamamoto et al., 1997</u>   | 1997 | OC                                                 | NS                        | SEI                 | MSE                     | 12  | S. (I-IV)              | Ascites                  | 2971                 | 4025      | pg/ml         | 66          | 2971           |
|                                |      |                                                    |                           |                     |                         | 21  | S. (I-IV)              | Serum                    | 295                  | 237       | pg/ml         | 7           | 295            |
| Zebrowski et al., 1999         | 1999 | RCC                                                | NS                        | ELISA               | MR                      | 3   | all pat.               | PE                       | 82                   |           | pg/mg protein | 55          | 2460           |
| Zebrowski et al., 1999         | 1999 | Sarcoma                                            | NS                        | ELISA               | MR                      | 4   | all pat.               | PE                       | 32                   |           | pg/mg protein | 21          | 960            |
| <i>Multiple cancer types</i>   |      |                                                    |                           |                     |                         |     |                        |                          |                      |           |               |             |                |
| Duysinx et al., 2008           | 2008 | BC, Lar, LC, Gen, KC, OC, PC, Sk, M                | NS                        | ELISA               | MR                      | 64  | all pat.               | PE                       | 665                  |           | pg/ml         | 15          | 665            |
| <u>Economidou et al., 2008</u> | 2008 | LC, U met                                          | NS                        | ELISA               | MR                      | 22  | all pat.               | PE                       | 657                  |           | pg/ml         | 15          | 657            |
|                                |      |                                                    |                           |                     |                         | 22  | all pat.               | Serum                    | 571                  |           | pg/ml         | 13          | 571            |
| Gieseler et al., 2007          | 2007 | GIC, LC, OC                                        | NS                        | ELISA               | MES                     | 60  | all pat.               | PE                       | 1286                 | 66        | pg/ml         | 29          | 1286           |
| <u>Hamed et al., 2004</u>      | 2004 | LC, BC, Lym                                        | NS                        | ELISA               | MSE                     | 15  | all pat.               | PE                       | 1007                 | 445       | pg/ml         | 22          | 1007           |
|                                |      |                                                    |                           |                     |                         | 15  | all pat.               | Serum                    | 814                  | 291       | pg/ml         | 18          | 814            |
| <u>Ishimoto et al., 2002</u>   | 2002 | LC, Lym, Mes, Pan                                  | NS                        | ELISA               | MR                      | 32  | all pat.               | PE                       | 1350                 |           | pg/ml         | 30          | 1350           |
|                                |      |                                                    |                           |                     |                         | 32  | all pat.               |                          | 381                  |           | pg/ml         | 8           | 381            |
| <u>Kyotza et al., 2010</u>     | 2010 | BC, GIC, LC, OC, others                            | NS                        | xMAP                | MR                      | 116 | all pat.               | PE                       | 170                  |           | pg/ml         | 4           | 170            |
|                                |      |                                                    |                           |                     |                         | 116 | all pat.               | Serum                    | 30                   |           | pg/ml         | 1           | 30             |
| Lee et al., 2008               | 2008 | CRC, Eso, GB, OC, Klastkin tumor, Pan, Stom, U met | NS                        | ELISA               | MSE                     | 21  | S. (IV)                | Ascites                  | 349                  | 491       | pg/ml         | 8           | 349            |
| Nascimento et al., 2004        | 2004 | BC, CRC, End, GC, L, Pan, PC, U                    | NS                        | ELISA               | Md                      | 19  | all pat.               | Ascites                  | 672                  |           | pg/ml         | 15          | 672            |
| Richardson et al., 2002        | 2002 | GC, L met, OC                                      | NS                        | ELISA               | MSE                     | 6   | all pat.               | Ascites                  | 4800                 | 1700      | pg/ml         | 107         | 4800           |
| <u>Shu et al., 2007</u>        | 2007 | *                                                  | NS                        | EIA                 | MSE                     | 32  | all pat.               | PE                       | 1358                 | 1493      | pg/ml         | 30          | 1358           |
|                                |      |                                                    |                           |                     |                         | 32  | all pat.               | Serum                    | 650                  | 533       | pg/ml         | 14          | 650            |
| Verheul et al., 2000           | 2000 | BC, GIC, LC, M, Mes, OC, STS, U                    | NS                        | ELISA               | MR                      | 47  | all pat.               | Ascites or PE            | 1290                 |           | pg/ml         | 29          | 1290           |
| Xue et al., 2007               | 2007 | BC, LC, Lym, Mes                                   | NS                        | ELISA               | MSE                     | 42  | all pat.               | PE                       | 1135                 | 321       | pg/ml         | 25          | 1135           |

## Footnotes

- 1 BC - Breast Cancer, CRC - Colorectal Cancer, End - Endometrial Cancer, Eso - Esophageal Cancer, GB, Glioblastoma, GC - Gastric Cancer, Gen - Genital, GIC - Gastrointest Cancer, L - Liver, Lar - Laryngeal Cancer, LC - Lung Cancer, Lym. - Lymphoma, KC - Kidney, OC - Ovarian Cancer, M - Melanoma, Mes - Mesothelioma, Pan - Pancreatic Car PC - Prostate Cancer, RCC - Renal Cell Carcinoma, Sk - Skin, Stom - Stomach, STS - Soft Tissue Sarcoma, U - Unknown; met - Metastases present
- 2 NS - Not specified
- 3 ELISA - Enzyme-Linked Immunosorbent Assay, EIA - Enzyme Immuno Assay, SEI - Sandwich Enzyme Immunoassay
- 4 Me - Mean, Md - Median, MR - Median and Range, MSE - Mean and Standard Error, R - Range, SD - Standard Deviation
- 5 all pat. - All Patients, Met. - Metastatic Cancer; Nmet - Nonmetastatic Cancer; S. (I-IV) - UICC Stage
- 6 PE - Pleural effusion
- e Estimate based on reported subgroup data
- \* primary bronchogenic carcinomas, adenocarcinomas of unknown origin, cancerous cells of indefinite origins discovered in PF, breast carcinoma, non-Hodgkin's lymphoma, squamous carcinoma of unknown origin
- † Underlined references report VEGF levels in ascites/PE and blood (plasma or serum)
